# Supplementary material
Source: PubMed Central journal article supplement (PMC7550106)
Supplement: mmc1.pdf [file mmc1.pdf]

# THE LANCET

## Respiratory Medicine

### Supplementary appendix

This appendix formed part of the original submission and has been peer reviewed. We post it as supplied by the authors.

Supplement to: Barco S, Valerio L, Ageno W, et al. Age-sex specific pulmonary embolism-related mortality in the USA and Canada, 2000–18: an analysis of the WHO Mortality Database and of the CDC Multiple Cause of Death database. *Lancet Respir Med* 2020; published online October 12. [https://doi.org/10.1016/S2213-2600\(20\)30417-3](https://doi.org/10.1016/S2213-2600(20)30417-3).

**Online Data Supplement**

---

**Table S1. Definition of PE based on ICD-10 codes.**

|                      | <b>ICD-10 Code</b>                | <b>Description</b>                                              | <b>WHO Mortality Database (2000-2015)</b> | <b>US n/N (%)</b>       | <b>Canada n/N (%)</b> | <b>Multiple Cause of Death database (2000-2018)</b>                                             | <b>US n/N (%)</b>       |
|----------------------|-----------------------------------|-----------------------------------------------------------------|-------------------------------------------|-------------------------|-----------------------|-------------------------------------------------------------------------------------------------|-------------------------|
| Pulmonary embolism   | I26.x                             | Pulmonary embolism                                              | Underlying cause of death*                | 143,474/200,610 (71.5%) | 11,460/15,798 (72.3%) | Underlying cause of death or contributing condition                                             | 567,322/587,875 (96.5%) |
|                      | O88.2                             | Obstetric thromboembolism (code O88 if sub-codes not recorded)  | Underlying cause of death                 | 344/200,610 (0.2%)      | 30/15,798 (0.2%)      | Underlying cause of death or contributing condition                                             | 679/587,875 (0.1%)      |
|                      | I82.2, I82.4, I82.6, I82.8, I82.9 | Acute embolism and thrombosis of specified or unspecified veins | Underlying cause of death                 | 3,413/200,610 (1.7%)    | 310/15,798 (2.0%)     | Underlying cause of death or contributing condition                                             | 23,250/587,875 (4.0%)   |
|                      |                                   |                                                                 |                                           |                         |                       |                                                                                                 |                         |
| Limb vein thrombosis | I80.x                             | Phlebitis and thrombophlebitis                                  | Underlying cause of death                 | 53,203/200,610 (26.5%)  | 3,987/15,798 (25.2%)  | Underlying cause of death or contributing condition listed along with a pulmonary embolism code | 96,886/587,875 (16.5%)  |
|                      | O870                              | Superficial thrombophlebitis in the puerperium                  | Underlying cause of death                 | 1/200,610 (<0.1%)       | 0                     | Underlying cause of death or contributing condition listed along with a pulmonary embolism code | 0                       |

|  |       |                                                    |                           |                    |                  |                                                                                                 |                     |
|--|-------|----------------------------------------------------|---------------------------|--------------------|------------------|-------------------------------------------------------------------------------------------------|---------------------|
|  | O22.2 | Superficial thrombophlebitis in pregnancy          | Underlying cause of death | 3/200,610 (<0.1%)  | 0                | Underlying cause of death or contributing listed along with a pulmonary embolism code           | 2/587,875 (<0.1%)   |
|  | O22.3 | Deep vein thrombosis in pregnancy                  | Underlying cause of death | 97/200,610 (<0.1%) | 5/15,798 (<0.1%) | Underlying cause of death or contributing condition listed along with a pulmonary embolism code | 100/587,875 (<0.1%) |
|  | O87.1 | Deep vein thrombosis in the puerperium             | Underlying cause of death | 4/200,610 (<0.1%)  | 2/15,798 (<0.1%) | Underlying cause of death or contributing condition listed along with a pulmonary embolism code | 4/587,875 (<0.1%)   |
|  | O22.9 | Venous complication in pregnancy, unspecified      | Underlying cause of death | 48/200,610 (<0.1%) | 3/15,798 (<0.1%) | Underlying cause of death or contributing condition listed along with a pulmonary embolism code | 34/587,875 (<0.1)   |
|  | O87.9 | Venous complication in the puerperium, unspecified | Underlying cause of death | 23/200,610 (<0.1%) | 1/15,798 (<0.1%) | Underlying cause of death or contributing condition listed along with a pulmonary embolism code | 25/587,875 (<0.1)   |

\* Underlying cause of death is defined as "the disease or injury which initiated the train of morbid events leading directly to death, or the circumstances of the accident or violence which produced the fatal injury" in accordance with the rules of the International Classification of Diseases. Source:

[https://apps.who.int/healthinfo/statistics/mortality/causeofdeath\\_query/help/description.html](https://apps.who.int/healthinfo/statistics/mortality/causeofdeath_query/help/description.html)

**Table S2. Definition of other conditions in the Multiple Cause of Death Database based on ICD-10 codes or chapters.**

| Condition               | ICD-10 Codes       | Definition                                                                                                                                                                                                                                                                                                      |
|-------------------------|--------------------|-----------------------------------------------------------------------------------------------------------------------------------------------------------------------------------------------------------------------------------------------------------------------------------------------------------------|
| Cancer                  | C.x                | Malignant neoplasms                                                                                                                                                                                                                                                                                             |
|                         | D00.x to D09.x     | Non-benign in situ neoplasms                                                                                                                                                                                                                                                                                    |
|                         | D37.x to D45.x     | Neoplasms of uncertain behavior, polycythemia vera                                                                                                                                                                                                                                                              |
|                         | Z85.x              | Personal history of malignant neoplasm*                                                                                                                                                                                                                                                                         |
| Cardiovascular diseases | I10.x to I15.x     | Essential (primary) hypertension; Hypertensive heart disease; Hypertensive chronic kidney disease; Hypertensive heart and chronic kidney disease; Secondary hypertension                                                                                                                                        |
|                         | I20.x to I25.x     | Ischemic heart diseases                                                                                                                                                                                                                                                                                         |
|                         | I27.x              | Other pulmonary heart diseases                                                                                                                                                                                                                                                                                  |
|                         | I31.x to I33.x     | Other diseases of pericardium; Pericarditis in diseases classified elsewhere; Acute and subacute endocarditis                                                                                                                                                                                                   |
|                         | I4.x               | Acute myocarditis; Myocarditis in diseases classified elsewhere; Cardiomyopathy; Cardiomyopathy in diseases classified elsewhere; Atrioventricular and left bundle-branch block; Other conduction disorders; Cardiac arrest; Paroxysmal tachycardia; Atrial fibrillation and flutter; Other cardiac arrhythmias |
|                         | I50.x              | Heart failure                                                                                                                                                                                                                                                                                                   |
|                         | I63.x to I67.x     | Cerebral infarction; Occlusion and stenosis of precerebral arteries, not resulting in cerebral infarction; Occlusion and stenosis of cerebral arteries, not resulting in cerebral infarction; Other cerebrovascular diseases                                                                                    |
|                         | I7.x               | Diseases of arteries, arterioles and capillaries                                                                                                                                                                                                                                                                |
| External causes         | V.x, W.x, X.x, Y.x | Accidents, falls, drowning, self-harm, assaults, exposure to fire or flames, medical devices with adverse events                                                                                                                                                                                                |
| Hemorrhage              | R04.x              | Hemorrhage from respiratory passages                                                                                                                                                                                                                                                                            |
|                         | R58.x              | Hemorrhage, not elsewhere classified                                                                                                                                                                                                                                                                            |
|                         | D62.x              | Acute posthemorrhagic anemia                                                                                                                                                                                                                                                                                    |

|  |                |                                                                    |
|--|----------------|--------------------------------------------------------------------|
|  | D683           | Hemorrhagic disorder due to circulating anticoagulants             |
|  | D699           | Hemorrhagic condition, unspecified                                 |
|  | K625           | Hemorrhage of anus and rectum                                      |
|  | K661           | Hemoperitoneum                                                     |
|  | K25.x to K28.x | Gastrointestinal ulcer with hemorrhage or hemorrhagic gastritis    |
|  | K920.x         | Hematemesis                                                        |
|  | K921.x         | Melena                                                             |
|  | K922.x         | Gastrointestinal hemorrhage, unspecified                           |
|  | H113.x         | Conjunctival hemorrhage                                            |
|  | H210           | Hyphema                                                            |
|  | H313           | Choroidal hemorrhage and rupture                                   |
|  | H356.x         | Retinal hemorrhage                                                 |
|  | H431.x         | Vitreous hemorrhage                                                |
|  | H450.x         | Vitreous hemorrhage in diseases classified elsewhere               |
|  | I60.x to I62.x | Subarachnoid or intracerebral bleeding                             |
|  | I312           | Hemopericardium, not elsewhere classified                          |
|  | J942           | Hemothorax                                                         |
|  | M250           | Hemarthrosis                                                       |
|  | N02.x          | Hematuria                                                          |
|  | N939           | Abnormal uterine and vaginal bleeding, unspecified                 |
|  | N950           | Postmenopausal bleeding                                            |
|  | R31.x          | Unspecified hematuria                                              |
|  | S06.x          | Epidural hemorrhage; Traumatic subdural or subarachnoid hemorrhage |
|  | S271           | Traumatic hemothorax                                               |
|  | T792           | Traumatic secondary and recurrent hemorrhage                       |
|  | A.x, B.x       | Certain infectious and parasitic diseases                          |

|                      |       |                                                                                     |
|----------------------|-------|-------------------------------------------------------------------------------------|
| Infectious diseases  | R65.x | Symptoms and signs specifically associated with systemic inflammation and infection |
| Respiratory diseases | J.x   | Diseases of the respiratory system                                                  |

\*No PE-related deaths were reported in association with Z-codes.

**Table S3. Total population by country, year, and sex.**

|               |                   | 2000        | 2001        | 2002        | 2003        | 2004        | 2005        | 2007        | 2008        | 2009        | 2010        | 2011        | 2012        | 2013        | 2014        | 2015        | 2016        | 2017        | 2018        |
|---------------|-------------------|-------------|-------------|-------------|-------------|-------------|-------------|-------------|-------------|-------------|-------------|-------------|-------------|-------------|-------------|-------------|-------------|-------------|-------------|
| United States | Men               | 138,761,588 | 140,249,955 | 141,624,546 | 142,928,382 | 144,227,349 | 145,568,081 | 146,962,229 | 148,389,984 | 149,828,894 | 151,244,420 | 152,610,910 | 153,923,757 | 155,189,795 | 156,408,505 | 157,581,861 | 158,712,121 | 159,798,231 | 160,840,943 |
| United States | Women             | 142,949,326 | 144,358,037 | 145,654,766 | 146,887,185 | 148,127,314 | 149,425,428 | 150,796,748 | 152,218,441 | 153,657,128 | 155,063,145 | 156,400,559 | 157,660,294 | 158,854,090 | 159,992,034 | 161,091,561 | 162,166,191 | 163,217,761 | 164,243,815 |
| United States | Entire population | 281,710,914 | 284,607,992 | 287,279,312 | 289,815,567 | 292,354,663 | 294,993,509 | 297,758,977 | 300,608,425 | 303,486,022 | 306,307,565 | 309,011,469 | 311,584,051 | 314,043,885 | 316,400,539 | 318,673,422 | 320,878,312 | 323,015,992 | 325,084,758 |
| Canada        | Men               | 15,152,318  | 15,299,307  | 15,449,335  | 15,605,073  | 15,769,779  | 15,945,444  | 16,133,439  | 16,332,207  | 16,537,195  | 16,741,973  | 16,941,808  | 17,134,966  | 17,322,343  | 17,505,031  | 17,685,123  | 17,864,138  | 18,042,095  | 18,218,176  |
| Canada        | Women             | 15,436,061  | 15,580,765  | 15,728,925  | 15,882,973  | 16,045,711  | 16,218,869  | 16,403,555  | 16,598,588  | 16,800,443  | 17,004,120  | 17,205,758  | 17,404,190  | 17,599,688  | 17,791,504  | 17,979,215  | 18,162,530  | 18,340,847  | 18,513,915  |
| Canada        | Entire population | 30,588,379  | 30,880,072  | 31,178,260  | 31,488,046  | 31,815,490  | 32,164,313  | 32,536,994  | 32,930,795  | 33,337,638  | 33,746,093  | 34,147,566  | 34,539,156  | 34,922,031  | 35,296,535  | 35,664,338  | 36,026,668  | 36,382,942  | 36,732,091  |

Population counts used for all calculations of mortality rates by sex and for the entire population. Source: United Nations, Department of Economic and Social Affairs, Population Division. World Population Prospects. <https://population.un.org/wpp/Download>; WPP2019\_PopulationByAgeSex\_MeWdium.csv (2019).

Accessed 2020-08-12.



**Table S4. Trends in PE-related age-standardized mortality rates in the US and Canada from 2000 to 2017: data from the WHO Mortality Database.**

|               |                   | 2000             | 2001             | 2002             | 2003             | 2004             | 2005             | 2006             | 2007             | 2008             | 2009             | 2010             | 2011             | 2012             | 2013             | 2014             | 2015             | 2016             | 2017             |
|---------------|-------------------|------------------|------------------|------------------|------------------|------------------|------------------|------------------|------------------|------------------|------------------|------------------|------------------|------------------|------------------|------------------|------------------|------------------|------------------|
| United States | Men               | 5.9<br>(5.8-6.1) | 5.9<br>(5.7-6.1) | 5.6<br>(5.5-5.8) | 5.8<br>(5.6-6.0) | 5.3<br>(5.2-5.5) | 5.4<br>(5.3-5.6) | 4.3<br>(4.2-4.5) | 4.4<br>(4.3-4.5) | 4.3<br>(4.2-4.4) | 4.1<br>(4.0-4.3) | 4.4<br>(4.2-4.5) | 4.4<br>(4.3-4.5) | 4.4<br>(4.3-4.5) | 4.4<br>(4.3-4.5) | 4.5<br>(4.4-4.6) | 4.7<br>(4.5-4.8) | 4.5<br>(4.4-4.6) | 4.5<br>(4.4-4.7) |
|               | Women             | 6.0<br>(5.9-6.2) | 6.1<br>(6.0-6.3) | 6.2<br>(6.0-6.3) | 5.9<br>(5.8-6.0) | 5.5<br>(5.4-5.7) | 5.5<br>(5.3-5.6) | 4.4<br>(4.3-4.5) | 4.5<br>(4.4-4.6) | 4.3<br>(4.2-4.4) | 4.2<br>(4.1-4.4) | 4.2<br>(4.1-4.3) | 4.2<br>(4.1-4.3) | 4.2<br>(4.1-4.3) | 4.2<br>(4.1-4.3) | 4.2<br>(4.1-4.3) | 4.3<br>(4.1-4.4) | 4.1<br>(4.0-4.3) | 4.1<br>(4.0-4.2) |
|               | Entire population | 6.0<br>(5.9-6.1) | 6.1<br>(5.9-6.2) | 6.0<br>(5.8-6.1) | 5.9<br>(5.8-6.0) | 5.5<br>(5.4-5.6) | 5.5<br>(5.4-5.6) | 4.4<br>(4.3-4.5) | 4.5<br>(4.4-4.6) | 4.3<br>(4.2-4.4) | 4.2<br>(4.1-4.3) | 4.3<br>(4.2-4.4) | 4.3<br>(4.3-4.4) | 4.3<br>(4.2-4.4) | 4.3<br>(4.2-4.4) | 4.4<br>(4.3-4.5) | 4.4<br>(4.4-4.5) | 4.3<br>(4.2-4.4) | 4.3<br>(4.3-4.4) |
| Canada        | Men               | 4.8<br>(4.3-5.3) | 4.2<br>(3.8-4.7) | 4.2<br>(3.8-4.7) | 4.3<br>(3.9-4.8) | 4.0<br>(3.6-4.5) | 4.1<br>(3.6-4.5) | 2.9<br>(2.6-3.3) | 3.0<br>(2.6-3.3) | 2.9<br>(2.6-3.3) | 3.5<br>(3.1-3.9) | 3.1<br>(2.8-3.5) | 3.1<br>(2.8-3.4) | 2.7<br>(2.4-3.0) | 2.7<br>(2.4-3.0) | 2.7<br>(2.5-3.0) | 2.8<br>(2.5-3.1) | 2.8<br>(2.5-3.1) | 2.6<br>(2.3-2.9) |
|               | Women             | 4.6<br>(4.2-5.0) | 4.6<br>(4.2-5.0) | 4.8<br>(4.4-5.2) | 4.6<br>(4.2-5.0) | 4.0<br>(3.7-4.4) | 4.2<br>(3.9-4.6) | 3.0<br>(2.7-3.3) | 3.0<br>(2.8-3.3) | 3.2<br>(2.9-3.5) | 3.0<br>(2.7-3.3) | 2.8<br>(2.6-3.1) | 3.0<br>(2.7-3.3) | 3.0<br>(2.7-3.2) | 2.6<br>(2.4-2.9) | 2.7<br>(2.4-2.9) | 2.8<br>(2.5-3.1) | 2.8<br>(2.6-3.1) | 2.6<br>(2.4-2.8) |
|               | Entire population | 4.7<br>(4.4-5.0) | 4.4<br>(4.2-4.7) | 4.6<br>(4.3-4.9) | 4.5<br>(4.3-4.8) | 4.1<br>(3.8-4.3) | 4.2<br>(3.9-4.4) | 3.0<br>(2.8-3.2) | 3.0<br>(2.8-3.2) | 3.0<br>(2.8-3.3) | 3.2<br>(3.0-3.4) | 3.0<br>(2.8-3.2) | 3.0<br>(2.8-3.2) | 2.9<br>(2.7-3.1) | 2.7<br>(2.5-2.9) | 2.7<br>(2.5-2.9) | 2.8<br>(2.6-3.0) | 2.8<br>(2.7-3.0) | 2.6<br>(2.4-2.8) |

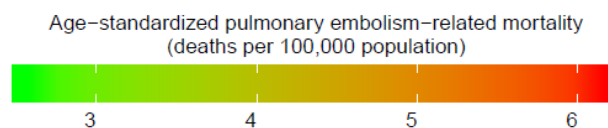

Data represent annual age-standardized pulmonary embolism-related mortality rates (number of deaths with pulmonary embolism as the underlying cause per 100,000 population) with corresponding 95% confidence intervals. Pulmonary embolism-related mortality rates across age groups are depicted in *Figure 2*.

**Table S5. JoinPoint analysis of trends in PE-related age-standardized mortality rates by country and sex (2000-2015).**

|                | <i>Men</i>      |                      |                 |                      |                 |                       |
|----------------|-----------------|----------------------|-----------------|----------------------|-----------------|-----------------------|
|                | <b>Period 1</b> |                      | <b>Period 2</b> |                      | <b>Period 3</b> |                       |
| <i>Country</i> | <i>Years</i>    | <i>Slope (95%CI)</i> | <i>Years</i>    | <i>Slope (95%CI)</i> | <i>Years</i>    | <i>Slope (95%CI)</i>  |
| United States  | 2000-2009       | -0.04 (-0.05; -0.03) | 2009-2015       | 0.02 (-0.001; 0.04)  | -               | -                     |
| Canada         | 2000-2015       | -0.04 (-0.05; -0.03) | -               | -                    | -               | -                     |
|                | <i>Women</i>    |                      |                 |                      |                 |                       |
|                | <b>Period 1</b> |                      | <b>Period 2</b> |                      | <b>Period 3</b> |                       |
| <i>Country</i> | <i>Years</i>    | <i>Slope (95%CI)</i> | <i>Years</i>    | <i>Slope (95%CI)</i> | <i>Years</i>    | <i>Slope (95%CI)</i>  |
| United States  | 2000-2003       | -0.002 (-0.04; 0.04) | 2003-2007       | -0.08 (-0.12; -0.04) | 2007-2015       | -0.004 (-0.01; -0.03) |
| Canada         | 2000-2003       | 0.01 (-0.05; 0.07)   | 2003-2006       | -0.13 (-0.22; -0.03) | 2006-2015       | -0.02 (-0.03; 0.004)  |
|                | <i>Total</i>    |                      |                 |                      |                 |                       |
|                | <b>Period 1</b> |                      | <b>Period 2</b> |                      | <b>Period 3</b> |                       |
| <i>Country</i> | <i>Years</i>    | <i>Slope (95%CI)</i> | <i>Years</i>    | <i>Slope (95%CI)</i> | <i>Years</i>    | <i>Slope (95%CI)</i>  |
| United States  | 2000-2003       | -0.003 (-0.04; 0.04) | 2003-2007       | -0.08 (-0.12; -0.04) | 2007-2015       | 0.002 (-0.008; 0.01)  |
| Canada         | 2000-2003       | 0.004 (-0.04; 0.05)  | 2003-2006       | -0.12 (-0.22; -0.02) | 2006-2015       | -0.02 (-0.03; 0.01)   |

Data represent annual changes in PE-related age-standardized mortality rates (number of deaths with pulmonary embolism as the underlying cause per 100,000 population) for each time period with corresponding 95% confidence intervals.

**Table S6. Conditions listed as the *underlying* cause of deaths from records listing PE among the causes of death: data from the Multiple Cause of Death database.**

|                                | 2000            | 2001            | 2002            | 2003            | 2004            | 2005            | 2006            | 2007            | 2008            | 2009            | 2010            | 2011            | 2012            | 2013            | 2014            | 2015            | 2016            | 2017            | 2018             |
|--------------------------------|-----------------|-----------------|-----------------|-----------------|-----------------|-----------------|-----------------|-----------------|-----------------|-----------------|-----------------|-----------------|-----------------|-----------------|-----------------|-----------------|-----------------|-----------------|------------------|
| Count                          | 26,540          | 27,306          | 27,556          | 28,271          | 27,449          | 28,241          | 28,692          | 28,772          | 29,746          | 29,333          | 30,485          | 31,584          | 31,977          | 32,470          | 33,438          | 34,952          | 35,515          | 37,333          | 38,215           |
| Pulmonary embolism, n (%)      | 8,615<br>(32·5) | 8,866<br>(32·5) | 8,836<br>(32·1) | 8,933<br>(31·6) | 8,363<br>(30·5) | 8,516<br>(30·2) | 7,089<br>(24·7) | 7,336<br>(25·5) | 7,349<br>(24·7) | 7,238<br>(24·7) | 7,534<br>(24·7) | 7,731<br>(24·5) | 7,906<br>(24·7) | 8,153<br>(25·1) | 8,393<br>(25·1) | 8,917<br>(25·5) | 8,768<br>(24·7) | 9,002<br>(24·1) | 9,121<br>(23·9)  |
| Limb vein thrombosis, n (%)    | 2,498<br>(9·4)  | 2,531<br>(9·3)  | 2,545<br>(9·2)  | 2,539<br>(9·0)  | 2,422<br>(8·8)  | 2,379<br>(8·4)  | 2,051<br>(7·1)  | 2,092<br>(7·3)  | 2,061<br>(6·9)  | 2,209<br>(7·5)  | 2,299<br>(7·5)  | 2,329<br>(7·4)  | 2,312<br>(7·2)  | 2,346<br>(7·2)  | 2,337<br>(7·0)  | 2,333<br>(6·7)  | 2,435<br>(6·9)  | 2,425<br>(6·5)  | 2,426<br>(6·3)   |
| Cancer, n (%)                  | 4,972<br>(18·7) | 5,397<br>(19·8) | 5,476<br>(19·9) | 5,745<br>(20·3) | 5,762<br>(21·0) | 6,235<br>(22·1) | 7,019<br>(24·5) | 7,017<br>(24·4) | 7,206<br>(24·2) | 7,263<br>(24·8) | 7,601<br>(24·9) | 8,091<br>(25·6) | 8,207<br>(25·7) | 8,266<br>(25·5) | 8,528<br>(25·5) | 8,827<br>(25·3) | 9,325<br>(26·3) | 9,971<br>(26·7) | 10,316<br>(27·0) |
| External causes, n (%)         | 1,600<br>(6·0)  | 1,676<br>(6·1)  | 1,534<br>(5·6)  | 1,502<br>(5·3)  | 1,436<br>(5·2)  | 1,419<br>(5·0)  | 1,594<br>(5·6)  | 1,556<br>(5·4)  | 1,492<br>(5·0)  | 1,430<br>(4·9)  | 1,504<br>(4·9)  | 1,507<br>(4·8)  | 1,337<br>(4·2)  | 1,393<br>(4·3)  | 1,439<br>(4·3)  | 1,458<br>(4·2)  | 1,464<br>(4·1)  | 1,571<br>(4·2)  | 1,609<br>(4·2)   |
| Respiratory diseases, n (%)    | 1,361<br>(5·1)  | 1,410<br>(5·2)  | 1,430<br>(5·2)  | 1,525<br>(5·4)  | 1,544<br>(5·6)  | 1,692<br>(6·0)  | 1,656<br>(5·8)  | 1,700<br>(5·9)  | 1,953<br>(6·6)  | 1,877<br>(6·4)  | 1,834<br>(6·0)  | 1,961<br>(6·2)  | 2,050<br>(6·4)  | 2,097<br>(6·5)  | 2,147<br>(6·4)  | 2,258<br>(6·5)  | 2,205<br>(6·2)  | 2,397<br>(6·4)  | 2,571<br>(6·7)   |
| Cardiovascular diseases, n (%) | 3,581<br>(13·5) | 3,510<br>(12·9) | 3,621<br>(13·1) | 3,720<br>(13·2) | 3,592<br>(13·1) | 3,551<br>(12·6) | 3,762<br>(13·1) | 3,591<br>(12·5) | 3,852<br>(12·9) | 3,568<br>(12·2) | 3,735<br>(12·3) | 3,815<br>(12·1) | 3,907<br>(12·2) | 3,964<br>(12·2) | 4,086<br>(12·2) | 4,266<br>(12·2) | 4,247<br>(12·0) | 4,619<br>(12·4) | 4,613<br>(12·1)  |
| Infectious diseases, n (%)     | 309<br>(1·2)    | 326<br>(1·2)    | 395<br>(1·4)    | 382<br>(1·4)    | 392<br>(1·4)    | 432<br>(1·5)    | 542<br>(1·9)    | 556<br>(1·9)    | 550<br>(1·8)    | 617<br>(2·1)    | 608<br>(2·0)    | 614<br>(1·9)    | 634<br>(2·0)    | 610<br>(1·9)    | 660<br>(2·0)    | 741<br>(2·1)    | 706<br>(2·0)    | 811<br>(2·2)    | 767<br>(2·0)     |

|                    | 2000            | 2001            | 2002            | 2003            | 2004            | 2005            | 2006            | 2007            | 2008            | 2009            | 2010            | 2011            | 2012            | 2013            | 2014            | 2015            | 2016            | 2017            | 2018            |
|--------------------|-----------------|-----------------|-----------------|-----------------|-----------------|-----------------|-----------------|-----------------|-----------------|-----------------|-----------------|-----------------|-----------------|-----------------|-----------------|-----------------|-----------------|-----------------|-----------------|
| Count              | 26,540          | 27,306          | 27,556          | 28,271          | 27,449          | 28,241          | 28,692          | 28,772          | 29,746          | 29,333          | 30,485          | 31,584          | 31,977          | 32,470          | 33,438          | 34,952          | 35,515          | 37,333          | 38,215          |
| Haemorrhage, n (%) | 271<br>(1·0)    | 234<br>(0·9)    | 249<br>(0·9)    | 260<br>(0·9)    | 274<br>(1·0)    | 252<br>(0·9)    | 350<br>(1·2)    | 352<br>(1·2)    | 349<br>(1·2)    | 366<br>(1·2)    | 358<br>(1·2)    | 378<br>(1·2)    | 338<br>(1·1)    | 364<br>(1·1)    | 370<br>(1·1)    | 410<br>(1·2)    | 409<br>(1·2)    | 461<br>(1·2)    | 471<br>(1·2)    |
| Other, n (%)       | 3,333<br>(12·6) | 3,356<br>(12·3) | 3,470<br>(12·6) | 3,665<br>(13·0) | 3,664<br>(13·3) | 3,765<br>(13·3) | 4,629<br>(16·1) | 4,572<br>(15·9) | 4,934<br>(16·6) | 4,765<br>(16·2) | 5,012<br>(16·4) | 5,158<br>(16·3) | 5,286<br>(16·5) | 5,277<br>(16·3) | 5,478<br>(16·4) | 5,742<br>(16·4) | 5,956<br>(16·8) | 6,076<br>(16·3) | 6,321<br>(16·5) |

The definition of contributing conditions is given in Table S2 of the Supplementary Material.

**Table S7. Conditions listed as *contributing* causes of death (any position of the death certificate) from records listing PE among the causes of death: data from the Multiple Cause of Death database.**

|                                | 2000             | 2001             | 2002             | 2003             | 2004             | 2005             | 2006             | 2007             | 2008             | 2009             | 2010             | 2011             | 2012             | 2013             | 2014             | 2015             | 2016             | 2017             | 2018             |
|--------------------------------|------------------|------------------|------------------|------------------|------------------|------------------|------------------|------------------|------------------|------------------|------------------|------------------|------------------|------------------|------------------|------------------|------------------|------------------|------------------|
| Count                          | 26,540           | 27,306           | 27,556           | 28,271           | 27,449           | 28,241           | 28,692           | 28,772           | 29,746           | 29,333           | 30,485           | 31,584           | 31,977           | 32,470           | 33,438           | 34,952           | 35,515           | 37,333           | 38,215           |
| Limb vein thrombosis, n (%)    | 4,456<br>(16·8)  | 4,583<br>(16·8)  | 4,636<br>(16·8)  | 4,695<br>(16·6)  | 4,531<br>(16·5)  | 4,629<br>(16·4)  | 4,842<br>(16·9)  | 4,833<br>(16·8)  | 4,991<br>(16·8)  | 5,123<br>(17·5)  | 5,198<br>(17·1)  | 5,370<br>(17·0)  | 5,442<br>(17·0)  | 5,391<br>(16·6)  | 5,580<br>(16·7)  | 5,552<br>(15·9)  | 5,643<br>(15·9)  | 5,691<br>(15·2)  | 5,863<br>(15·3)  |
| Cancer, n (%)                  | 6,279<br>(23·7)  | 6,715<br>(24·6)  | 6,897<br>(25·0)  | 7,039<br>(24·9)  | 7,068<br>(25·7)  | 7,542<br>(26·7)  | 7,678<br>(26·8)  | 7,699<br>(26·8)  | 7,885<br>(26·5)  | 7,934<br>(27·0)  | 8,320<br>(27·3)  | 8,796<br>(27·8)  | 8,943<br>(28·0)  | 9,060<br>(27·9)  | 9,356<br>(28·0)  | 9,706<br>(27·8)  | 10,180<br>(28·7) | 11,019<br>(29·5) | 11,395<br>(29·8) |
| External causes, n (%)         | 2,839<br>(10·7)  | 2,916<br>(10·7)  | 2,790<br>(10·1)  | 2,725<br>(9·6)   | 2,619<br>(9·5)   | 2,543<br>(9·0)   | 2,604<br>(9·1)   | 2,569<br>(8·9)   | 2,493<br>(8·4)   | 2,400<br>(8·2)   | 2,448<br>(8·0)   | 2,520<br>(8·0)   | 2,305<br>(7·2)   | 2,455<br>(7·6)   | 2,507<br>(7·5)   | 2,521<br>(7·2)   | 2,701<br>(7·6)   | 2,807<br>(7·5)   | 2,991<br>(7·8)   |
| Respiratory diseases, n (%)    | 6,168<br>(23·2)  | 6,443<br>(23·6)  | 6,663<br>(24·2)  | 7,085<br>(25·1)  | 7,134<br>(26·0)  | 7,446<br>(26·4)  | 7,672<br>(26·7)  | 7,686<br>(26·7)  | 8,376<br>(28·2)  | 8,212<br>(28·0)  | 8,689<br>(28·5)  | 9,371<br>(29·7)  | 9,494<br>(29·7)  | 9,908<br>(30·5)  | 10,256<br>(30·7) | 11,029<br>(31·6) | 11,330<br>(31·9) | 12,306<br>(33·0) | 12,717<br>(33·3) |
| Cardiovascular diseases, n (%) | 11,824<br>(44·6) | 12,106<br>(44·3) | 12,325<br>(44·7) | 12,656<br>(44·8) | 12,377<br>(45·1) | 12,878<br>(45·6) | 13,168<br>(45·9) | 13,292<br>(46·2) | 13,889<br>(46·7) | 13,641<br>(46·5) | 14,367<br>(47·1) | 15,005<br>(47·5) | 15,625<br>(48·9) | 15,886<br>(48·9) | 16,408<br>(49·1) | 17,394<br>(49·8) | 17,765<br>(50·0) | 18,934<br>(50·7) | 19,653<br>(51·4) |
| Infectious diseases, n (%)     | 1,347<br>(5·1)   | 1,346<br>(4·9)   | 1,501<br>(5·4)   | 1,621<br>(5·7)   | 1,683<br>(6·1)   | 1,805<br>(6·4)   | 1,756<br>(6·1)   | 1,880<br>(6·5)   | 1,915<br>(6·4)   | 2,048<br>(7·0)   | 2,082<br>(6·8)   | 2,139<br>(6·8)   | 2,210<br>(6·9)   | 2,305<br>(7·1)   | 2,527<br>(7·6)   | 2,818<br>(8·1)   | 2,950<br>(8·3)   | 3,186<br>(8·5)   | 3,336<br>(8·7)   |
| Haemorrhage, n (%)             | 1,115<br>(4·2)   | 1,204<br>(4·4)   | 1,203<br>(4·4)   | 1,253<br>(4·4)   | 1,348<br>(4·9)   | 1,305<br>(4·6)   | 1,437<br>(5·0)   | 1,414<br>(4·9)   | 1,463<br>(4·9)   | 1,471<br>(5·0)   | 1,552<br>(5·1)   | 1,649<br>(5·2)   | 1,645<br>(5·1)   | 1,721<br>(5·3)   | 1,833<br>(5·5)   | 2,002<br>(5·7)   | 2,071<br>(5·8)   | 2,230<br>(6·0)   | 2,348<br>(6·1)   |

The definition of contributing conditions is given in Table S2 of the Supplementary Material.

**Table S8. Underlying cause-specific age-standardized mortality rates from records listing PE among the causes of death: data from the Multiple**

**Cause of Death database.**

|                                            | 2000                | 2001                | 2002                | 2003                | 2004                | 2005                | 2006                | 2007                | 2008                | 2009                | 2010                | 2011                | 2012                | 2013                | 2014                | 2015                | 2016                | 2017                | 2018                |
|--------------------------------------------|---------------------|---------------------|---------------------|---------------------|---------------------|---------------------|---------------------|---------------------|---------------------|---------------------|---------------------|---------------------|---------------------|---------------------|---------------------|---------------------|---------------------|---------------------|---------------------|
| Pulmonary embolism or limb vein thrombosis | 5.65<br>(5.54-5.76) | 5.69<br>(5.58-5.80) | 5.56<br>(5.46-5.67) | 5.50<br>(5.40-5.60) | 5.10<br>(5.01-5.20) | 5.10<br>(5.00-5.20) | 4.13<br>(4.04-4.22) | 4.18<br>(4.10-4.27) | 4.07<br>(3.99-4.15) | 3.98<br>(3.89-4.06) | 4.08<br>(4.00-4.16) | 4.08<br>(4.00-4.16) | 4.08<br>(4.00-4.16) | 4.10<br>(4.02-4.18) | 4.13<br>(4.05-4.21) | 4.23<br>(4.15-4.31) | 4.12<br>(4.04-4.19) | 4.13<br>(4.06-4.21) | 4.11<br>(4.03-4.19) |
| Cancer                                     | 2.57<br>(2.50-2.65) | 2.76<br>(2.68-2.83) | 2.75<br>(2.68-2.82) | 2.85<br>(2.78-2.93) | 2.81<br>(2.74-2.89) | 3.00<br>(2.93-3.08) | 3.30<br>(3.22-3.38) | 3.25<br>(3.17-3.32) | 3.27<br>(3.19-3.35) | 3.20<br>(3.13-3.28) | 3.28<br>(3.21-3.36) | 3.41<br>(3.34-3.49) | 3.39<br>(3.31-3.46) | 3.34<br>(3.26-3.41) | 3.34<br>(3.27-3.42) | 3.40<br>(3.33-3.47) | 3.49<br>(3.42-3.57) | 3.66<br>(3.59-3.73) | 3.70<br>(3.63-3.77) |
| External causes                            | 0.82<br>(0.78-0.86) | 0.84<br>(0.80-0.88) | 0.75<br>(0.71-0.78) | 0.72<br>(0.68-0.76) | 0.67<br>(0.64-0.71) | 0.66<br>(0.63-0.70) | 0.72<br>(0.69-0.76) | 0.68<br>(0.65-0.72) | 0.64<br>(0.61-0.68) | 0.61<br>(0.58-0.64) | 0.63<br>(0.60-0.67) | 0.61<br>(0.58-0.64) | 0.53<br>(0.50-0.56) | 0.54<br>(0.51-0.57) | 0.55<br>(0.52-0.58) | 0.55<br>(0.52-0.58) | 0.54<br>(0.51-0.56) | 0.57<br>(0.54-0.60) | 0.57<br>(0.54-0.60) |
| Respiratory diseases                       | 0.73<br>(0.69-0.77) | 0.74<br>(0.70-0.78) | 0.75<br>(0.71-0.79) | 0.78<br>(0.74-0.82) | 0.78<br>(0.74-0.82) | 0.85<br>(0.81-0.89) | 0.82<br>(0.78-0.86) | 0.82<br>(0.78-0.86) | 0.92<br>(0.88-0.97) | 0.86<br>(0.82-0.90) | 0.83<br>(0.79-0.87) | 0.87<br>(0.83-0.91) | 0.88<br>(0.84-0.92) | 0.88<br>(0.85-0.92) | 0.88<br>(0.84-0.92) | 0.91<br>(0.87-0.95) | 0.86<br>(0.83-0.90) | 0.92<br>(0.88-0.96) | 0.96<br>(0.92-1.00) |
| Cardiovascular diseases                    | 1.92<br>(1.86-1.99) | 1.84<br>(1.78-1.90) | 1.86<br>(1.80-1.93) | 1.89<br>(1.83-1.95) | 1.81<br>(1.75-1.87) | 1.76<br>(1.71-1.82) | 1.82<br>(1.76-1.88) | 1.70<br>(1.64-1.75) | 1.79<br>(1.73-1.84) | 1.62<br>(1.57-1.67) | 1.66<br>(1.61-1.71) | 1.65<br>(1.60-1.71) | 1.65<br>(1.60-1.70) | 1.63<br>(1.58-1.69) | 1.65<br>(1.59-1.70) | 1.70<br>(1.65-1.75) | 1.63<br>(1.58-1.68) | 1.74<br>(1.69-1.79) | 1.70<br>(1.65-1.75) |

|                     | 2000                    | 2001                    | 2002                    | 2003                    | 2004                    | 2005                    | 2006                    | 2007                    | 2008                    | 2009                    | 2010                    | 2011                    | 2012                    | 2013                    | 2014                    | 2015                    | 2016                    | 2017                    | 2018                    |
|---------------------|-------------------------|-------------------------|-------------------------|-------------------------|-------------------------|-------------------------|-------------------------|-------------------------|-------------------------|-------------------------|-------------------------|-------------------------|-------------------------|-------------------------|-------------------------|-------------------------|-------------------------|-------------------------|-------------------------|
| Infectious diseases | 0·15<br>(0·14-<br>0·17) | 0·16<br>(0·14-<br>0·17) | 0·19<br>(0·17-<br>0·21) | 0·18<br>(0·16-<br>0·20) | 0·19<br>(0·17-<br>0·21) | 0·21<br>(0·19-<br>0·23) | 0·25<br>(0·23-<br>0·28) | 0·25<br>(0·23-<br>0·27) | 0·24<br>(0·22-<br>0·26) | 0·27<br>(0·25-<br>0·30) | 0·26<br>(0·24-<br>0·29) | 0·26<br>(0·24-<br>0·28) | 0·26<br>(0·24-<br>0·28) | 0·24<br>(0·22-<br>0·26) | 0·26<br>(0·24-<br>0·28) | 0·29<br>(0·27-<br>0·31) | 0·27<br>(0·25-<br>0·29) | 0·30<br>(0·28-<br>0·32) | 0·28<br>(0·26-<br>0·30) |
| Haemorrhage         | 0·14<br>(0·12-<br>0·16) | 0·12<br>(0·11-<br>0·14) | 0·13<br>(0·11-<br>0·15) | 0·13<br>(0·11-<br>0·15) | 0·13<br>(0·12-<br>0·15) | 0·13<br>(0·11-<br>0·14) | 0·17<br>(0·15-<br>0·18) | 0·17<br>(0·15-<br>0·18) | 0·16<br>(0·14-<br>0·18) | 0·16<br>(0·15-<br>0·18) | 0·16<br>(0·14-<br>0·17) | 0·16<br>(0·15-<br>0·18) | 0·14<br>(0·13-<br>0·16) | 0·15<br>(0·14-<br>0·17) | 0·15<br>(0·14-<br>0·17) | 0·16<br>(0·15-<br>0·18) | 0·16<br>(0·14-<br>0·17) | 0·17<br>(0·16-<br>0·19) | 0·17<br>(0·16-<br>0·19) |

Numbers are expressed as underlying cause-specific deaths per 100,000 population-years (95% confidence interval). The definition of contributing conditions is given in Table S2 of the Supplementary Material.

**Table S9. Contributing cause-specific age-standardized mortality rates from records listing PE among the causes of death: data from the Multiple Cause of Death database.**

|                         | 2000                    | 2001                    | 2002                    | 2003                    | 2004                    | 2005                    | 2006                    | 2007                    | 2008                    | 2009                    | 2010                    | 2011                    | 2012                    | 2013                    | 2014                    | 2015                    | 2016                    | 2017                    | 2018                    |
|-------------------------|-------------------------|-------------------------|-------------------------|-------------------------|-------------------------|-------------------------|-------------------------|-------------------------|-------------------------|-------------------------|-------------------------|-------------------------|-------------------------|-------------------------|-------------------------|-------------------------|-------------------------|-------------------------|-------------------------|
| Cancer                  | 3.27<br>(3.19-<br>3.35) | 3.45<br>(3.36-<br>3.53) | 3.48<br>(3.40-<br>3.56) | 3.51<br>(3.42-<br>3.59) | 3.47<br>(3.39-<br>3.55) | 3.65<br>(3.56-<br>3.73) | 3.62<br>(3.54-<br>3.71) | 3.57<br>(3.49-<br>3.65) | 3.59<br>(3.51-<br>3.67) | 3.51<br>(3.44-<br>3.59) | 3.61<br>(3.53-<br>3.69) | 3.72<br>(3.64-<br>3.80) | 3.71<br>(3.63-<br>3.78) | 3.67<br>(3.59-<br>3.75) | 3.69<br>(3.61-<br>3.76) | 3.75<br>(3.68-<br>3.83) | 3.83<br>(3.75-<br>3.91) | 4.06<br>(3.98-<br>4.14) | 4.10<br>(4.02-<br>4.18) |
| External causes         | 1.46<br>(1.41-<br>1.52) | 1.46<br>(1.41-<br>1.52) | 1.36<br>(1.31-<br>1.41) | 1.32<br>(1.27-<br>1.37) | 1.23<br>(1.19-<br>1.28) | 1.20<br>(1.15-<br>1.25) | 1.19<br>(1.14-<br>1.23) | 1.14<br>(1.10-<br>1.19) | 1.09<br>(1.05-<br>1.14) | 1.03<br>(0.99-<br>1.07) | 1.04<br>(1.00-<br>1.08) | 1.03<br>(0.99-<br>1.07) | 0.93<br>(0.89-<br>0.97) | 0.97<br>(0.93-<br>1.01) | 0.97<br>(0.93-<br>1.01) | 0.96<br>(0.92-<br>1.00) | 1.00<br>(0.96-<br>1.04) | 1.02<br>(0.99-<br>1.06) | 1.07<br>(1.03-<br>1.11) |
| Respiratory diseases    | 3.28<br>(3.20-<br>3.36) | 3.36<br>(3.28-<br>3.44) | 3.41<br>(3.33-<br>3.50) | 3.57<br>(3.49-<br>3.66) | 3.57<br>(3.49-<br>3.66) | 3.68<br>(3.60-<br>3.77) | 3.70<br>(3.62-<br>3.79) | 3.63<br>(3.55-<br>3.72) | 3.89<br>(3.80-<br>3.97) | 3.70<br>(3.62-<br>3.79) | 3.86<br>(3.78-<br>3.94) | 4.05<br>(3.97-<br>4.14) | 4.01<br>(3.93-<br>4.10) | 4.10<br>(4.02-<br>4.18) | 4.13<br>(4.05-<br>4.21) | 4.35<br>(4.27-<br>4.43) | 4.35<br>(4.27-<br>4.44) | 4.62<br>(4.54-<br>4.70) | 4.66<br>(4.58-<br>4.75) |
| Cardiovascular diseases | 6.27<br>(6.16-<br>6.39) | 6.27<br>(6.16-<br>6.39) | 6.29<br>(6.18-<br>6.40) | 6.35<br>(6.23-<br>6.46) | 6.13<br>(6.02-<br>6.24) | 6.30<br>(6.19-<br>6.41) | 6.28<br>(6.17-<br>6.39) | 6.21<br>(6.10-<br>6.32) | 6.36<br>(6.26-<br>6.47) | 6.11<br>(6.00-<br>6.21) | 6.32<br>(6.21-<br>6.42) | 6.43<br>(6.32-<br>6.53) | 6.53<br>(6.43-<br>6.64) | 6.49<br>(6.38-<br>6.59) | 6.56<br>(6.46-<br>6.66) | 6.82<br>(6.71-<br>6.92) | 6.77<br>(6.67-<br>6.88) | 7.08<br>(6.98-<br>7.19) | 7.19<br>(7.09-<br>7.29) |
| Infectious diseases     | 0.68<br>(0.65-<br>0.72) | 0.68<br>(0.64-<br>0.71) | 0.74<br>(0.70-<br>0.78) | 0.78<br>(0.75-<br>0.82) | 0.81<br>(0.77-<br>0.85) | 0.86<br>(0.82-<br>0.90) | 0.82<br>(0.78-<br>0.86) | 0.86<br>(0.82-<br>0.90) | 0.85<br>(0.82-<br>0.89) | 0.90<br>(0.86-<br>0.94) | 0.90<br>(0.86-<br>0.94) | 0.90<br>(0.86-<br>0.94) | 0.90<br>(0.87-<br>0.94) | 0.93<br>(0.89-<br>0.97) | 0.99<br>(0.95-<br>1.03) | 1.08<br>(1.04-<br>1.13) | 1.10<br>(1.06-<br>1.14) | 1.17<br>(1.13-<br>1.21) | 1.20<br>(1.15-<br>1.24) |
| Haemorrhage             | 0.58<br>(0.55-<br>0.62) | 0.62<br>(0.59-<br>0.66) | 0.61<br>(0.58-<br>0.65) | 0.63<br>(0.59-<br>0.66) | 0.66<br>(0.63-<br>0.70) | 0.64<br>(0.61-<br>0.68) | 0.69<br>(0.65-<br>0.72) | 0.66<br>(0.63-<br>0.70) | 0.67<br>(0.64-<br>0.71) | 0.66<br>(0.63-<br>0.70) | 0.68<br>(0.65-<br>0.72) | 0.71<br>(0.68-<br>0.75) | 0.70<br>(0.66-<br>0.73) | 0.71<br>(0.67-<br>0.74) | 0.74<br>(0.71-<br>0.78) | 0.79<br>(0.75-<br>0.82) | 0.80<br>(0.76-<br>0.83) | 0.84<br>(0.81-<br>0.88) | 0.86<br>(0.83-<br>0.90) |



|       | 2000    | 2001    | 2002    | 2003    | 2004    | 2005    | 2006    | 2007    | 2008    | 2009    | 2010    | 2011    | 2012    | 2013    | 2014    | 2015    | 2016    | 2017    | 2018    |
|-------|---------|---------|---------|---------|---------|---------|---------|---------|---------|---------|---------|---------|---------|---------|---------|---------|---------|---------|---------|
| Total | 13·65   | 13·78   | 13·66   | 13·78   | 13·22   | 13·45   | 13·33   | 13·10   | 13·29   | 12·76   | 13·06   | 13·20   | 13·09   | 13·00   | 13·11   | 13·45   | 13·31   | 13·74   | 13·78   |
|       | (13·49- | (13·62- | (13·49- | (13·62- | (13·06- | (13·29- | (13·17- | (12·95- | (13·14- | (12·61- | (12·91- | (13·05- | (12·95- | (12·86- | (12·96- | (13·30- | (13·17- | (13·60- | (13·64- |
|       | 13·82)  | 13·95)  | 13·82)  | 13·95)  | 13·38)  | 13·61)  | 13·49)  | 13·26)  | 13·45)  | 12·91)  | 13·21)  | 13·35)  | 13·24)  | 13·15)  | 13·25)  | 13·59)  | 13·45)  | 13·88)  | 13·92)  |

**Figure S1. Trends in PE-related age-standardized mortality in the US and Canada from 2000 to 2015.**

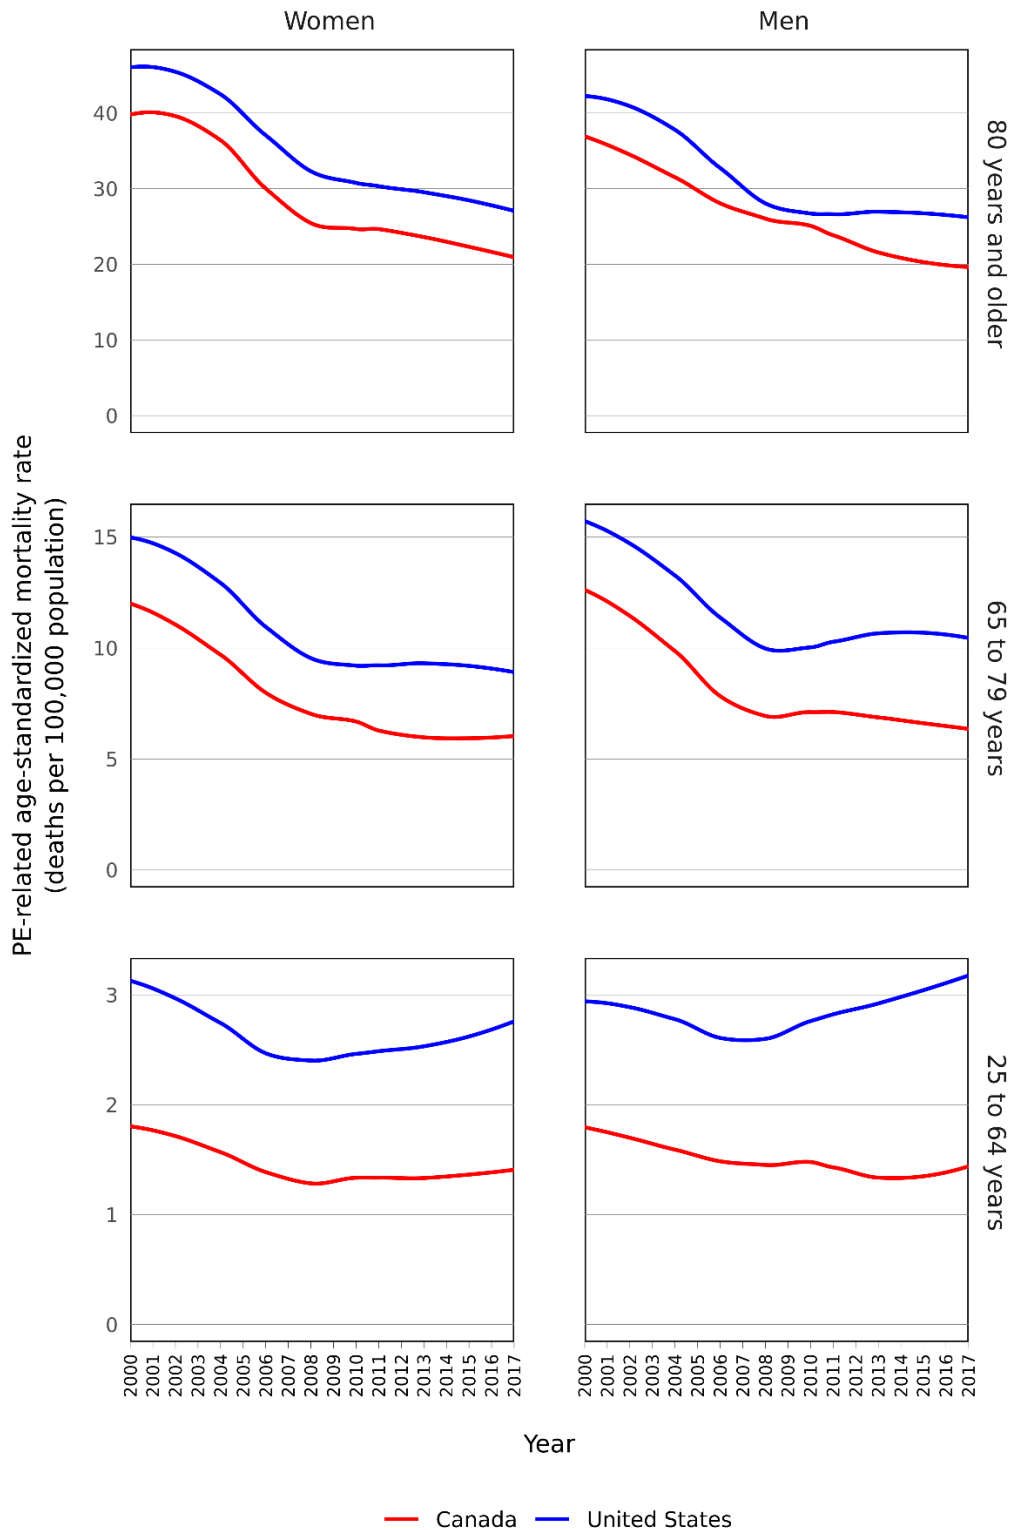

Data from the WHO Mortality Database. Locally weighted scatterplot smoother (LOESS) lines were used to depict the annual age-standardized pulmonary embolism-related mortality rate (number of deaths with pulmonary embolism as the underlying cause per 100,000 population).

Figure S2. Trends in PE-related age-standardised mortality for ethnicity and sex in the United States from 2000 to 2018.

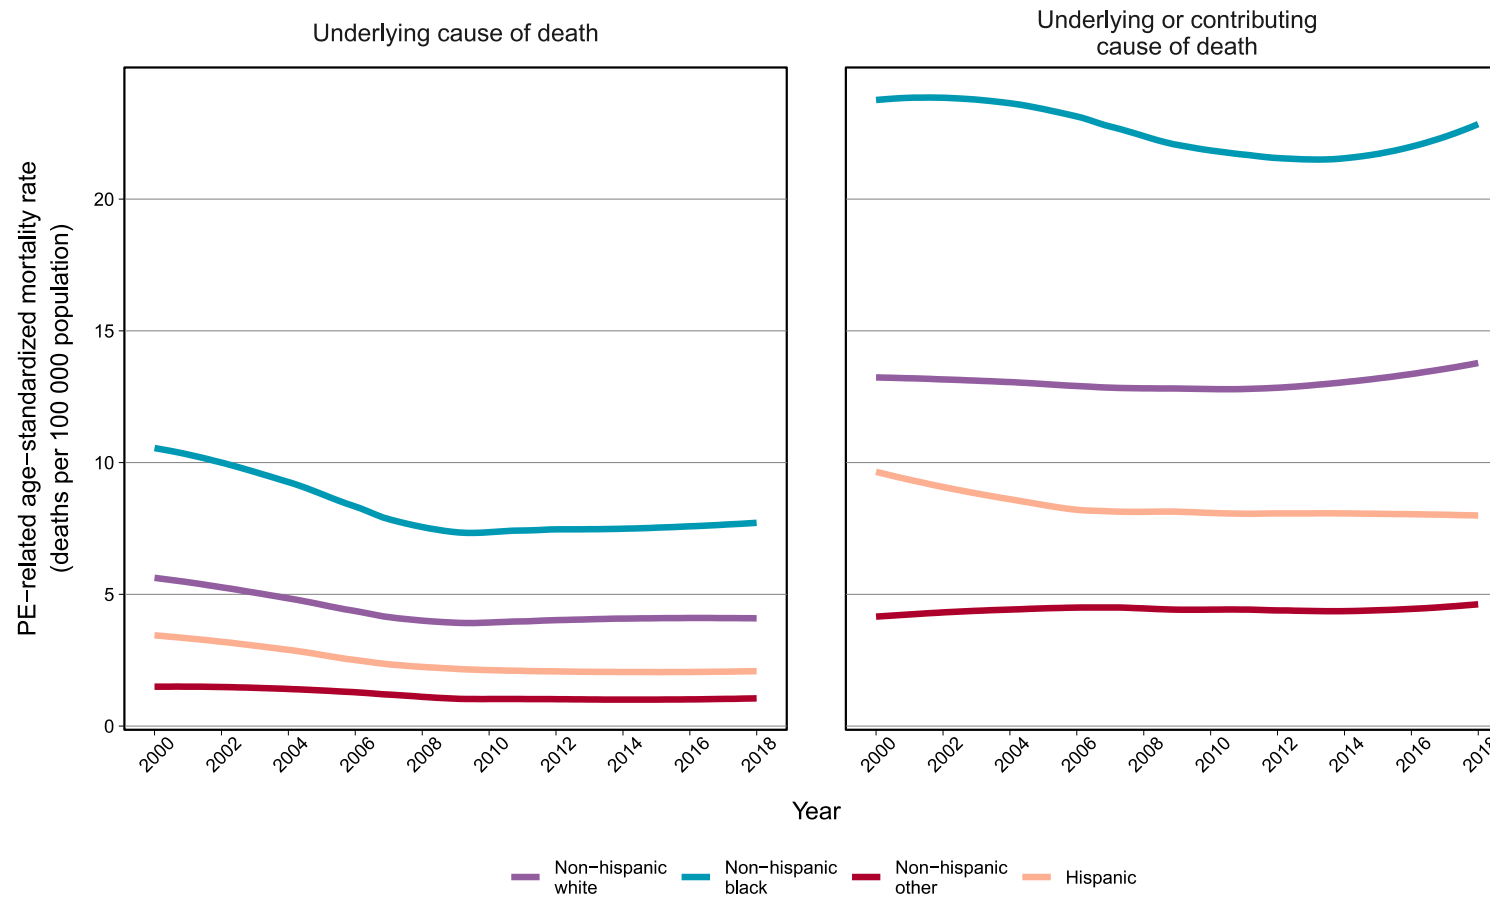

Data from the Multiple Cause of Death Database. Locally weighted scatterplot smoother (LOESS) lines for the PE-related age-standardised rate (number of deaths per 100,000 population).

**Figure S3. Trends in the contribution of PE-related mortality to total mortality in the US and Canada (2000-2015).**

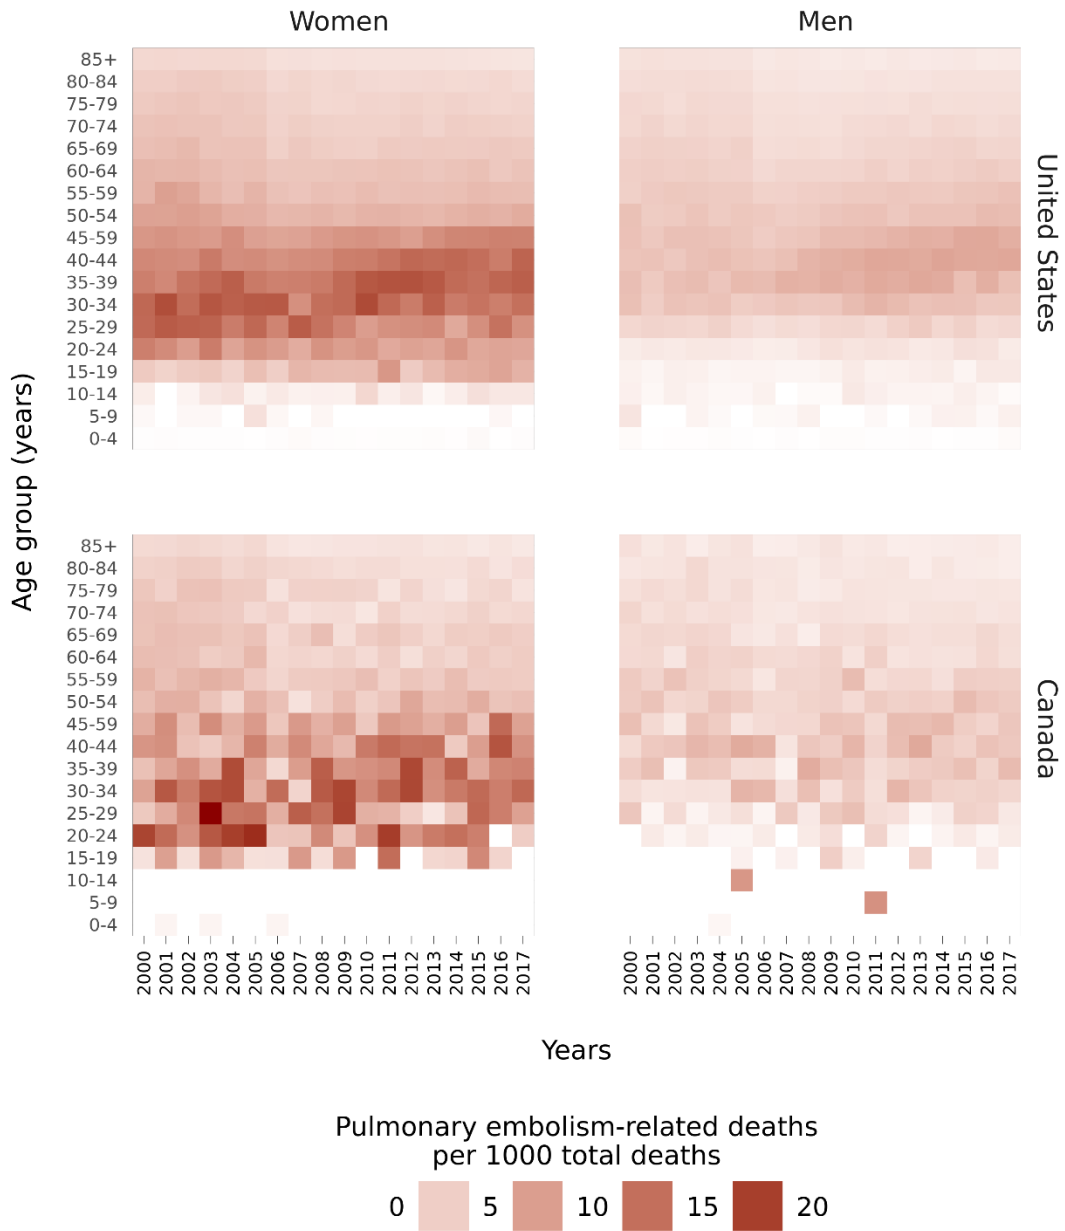

Data from the WHO Mortality Database. Mortality rate by age group (observed) and average annual number of deaths with PE as the underlying cause per 1000 total deaths.

**Figure S4. Trends in PE-related age-standardized mortality rates in the US.**

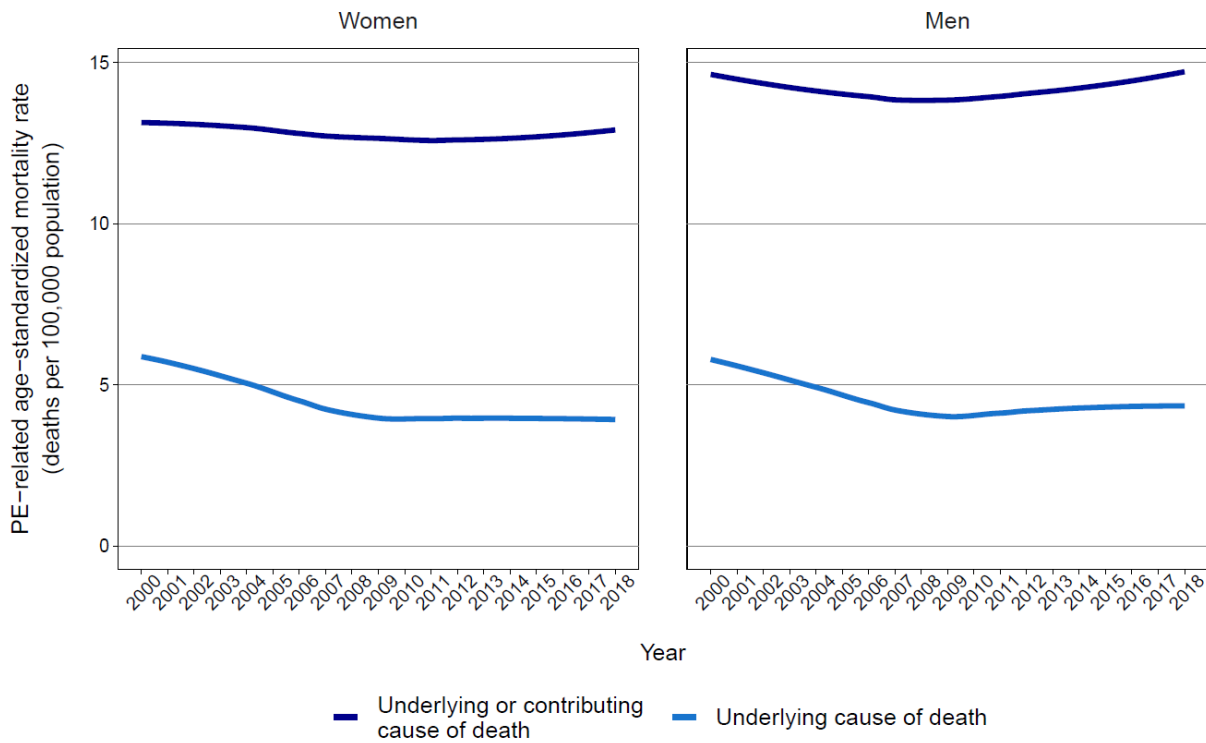

Data from the Multiple Cause of Death database. Locally weighted scatterplot smoother (LOESS) lines for the PE-related age-standardised mortality rate (number of deaths per 100,000 population) related to PE listed as the underlying cause of death or in any position of the death certificate.

Figure S5. Median age at death by underlying cause of death.

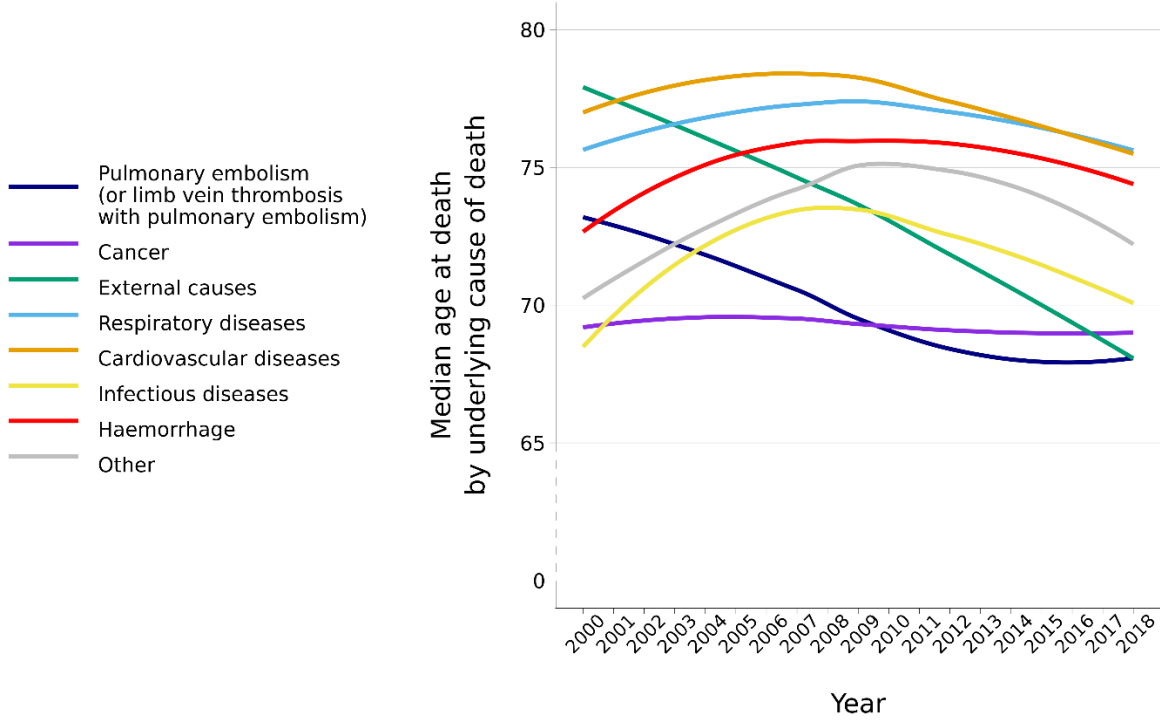

Data from the Multiple Cause of Death database.

**Figure S6. Use of autopsy in patients with PE in the US.**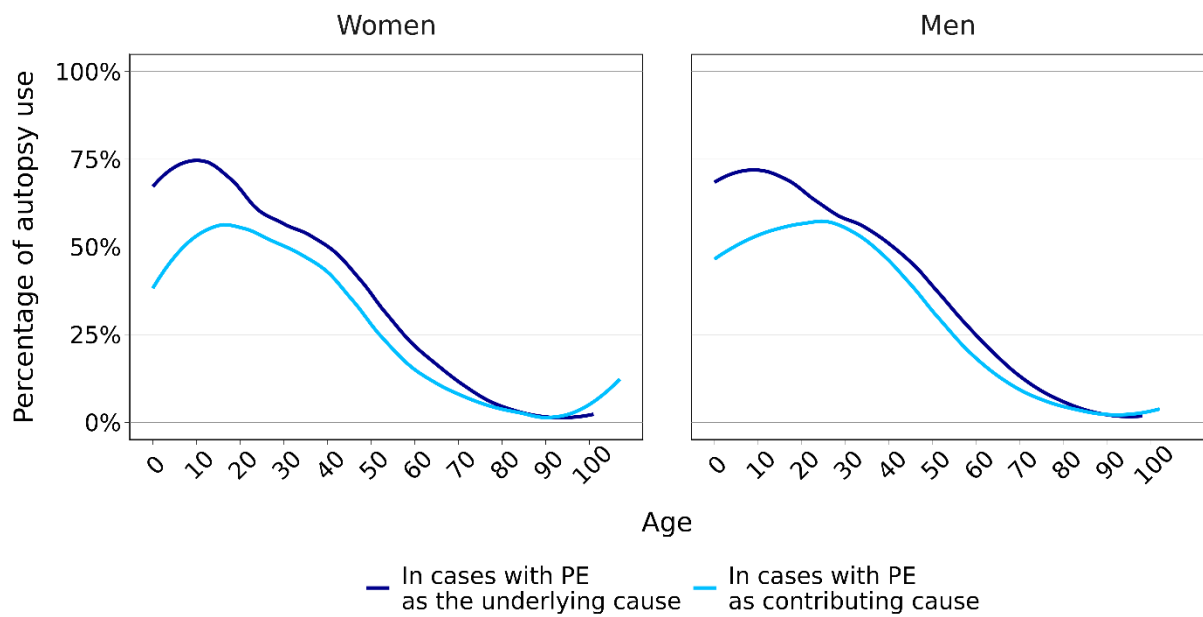

Data from the Multiple Cause of Death database. Between 2003 (the first year with available information on autopsy) and 2018, autopsy was performed after 21,782 (17.9%) of 121,416 deaths with PE as the underlying cause of death; the use of autopsy remained stable from 2003 to 2018 (beta coefficient -0.07%; 95%CI -0.16%, +0.02%). Of 356,786 deaths with PE as a contributing cause of death, autopsy was performed in 44,813 (12.6%) cases (beta coefficient -0.18%; 95%CI -0.22%, -0.13%). Autopsy was performed more often in men than in women, irrespective of whether PE was listed as the underlying cause of death (absolute difference +4.3%, 95%CI +3.9%; +4.7%) or as a contributing cause of death (absolute difference +3.6%; 95%CI +3.4%; +3.9%), and in younger patients.

## Addendum

---

Statistical source code used to generate estimates can be obtained from the study statistician (Dr. Luca Valerio, [luca.valerio@uni-mainz.de](mailto:luca.valerio@uni-mainz.de)).

Source data can be downloaded at [https://www.who.int/healthinfo/mortality\\_data/en/](https://www.who.int/healthinfo/mortality_data/en/) (WHO Mortality data) and [https://www.cdc.gov/nchs/data\\_access/vitalstatsonline.htm](https://www.cdc.gov/nchs/data_access/vitalstatsonline.htm) (US Centers for Disease Control and Prevention, National Center for Health Statistics: Mortality Multiple Cause Files).
